# Supplementary material for: Phosphate Solubilization and Plant Growth Promotion by Pantoea brenneri Soil Isolates
Source: MDPI journal article supplement (doi:10.3390/microorganisms11051136), 2023-04-27
Supplement: s1 [file s1]

## Supplementary Material

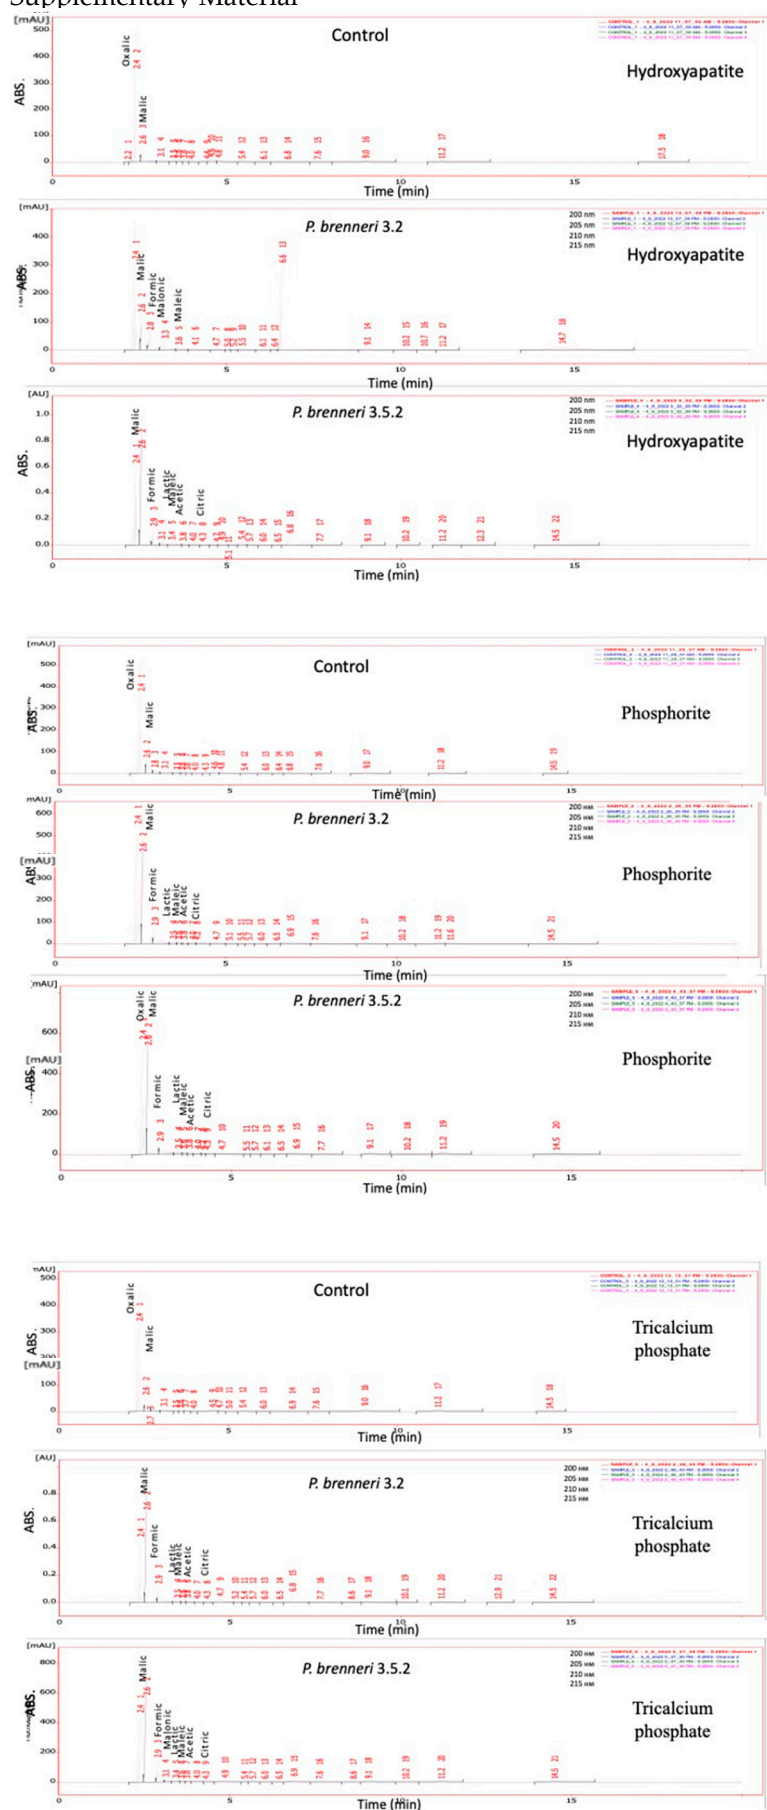

**Figure S1.** Organic acid production by *P. breunneri* 3.2 and *P. breunneri* 3.5.2 on liquid medium NBRIP with different P sources: A – hydroxyapatite, B – phosphorite, C – tricalcium phosphate.
